# Supplementary material for: Anti-inflammatory and Antifibrotic Potential of Longidaza in the Bleomycin-induced Pulmonary Fibrosis
Source: Preprints.org preprint supplement (doi:10.20944/preprints202307.1440.v1), 2023-07-21
Supplement: Supplementary file 4 [file supplementary]

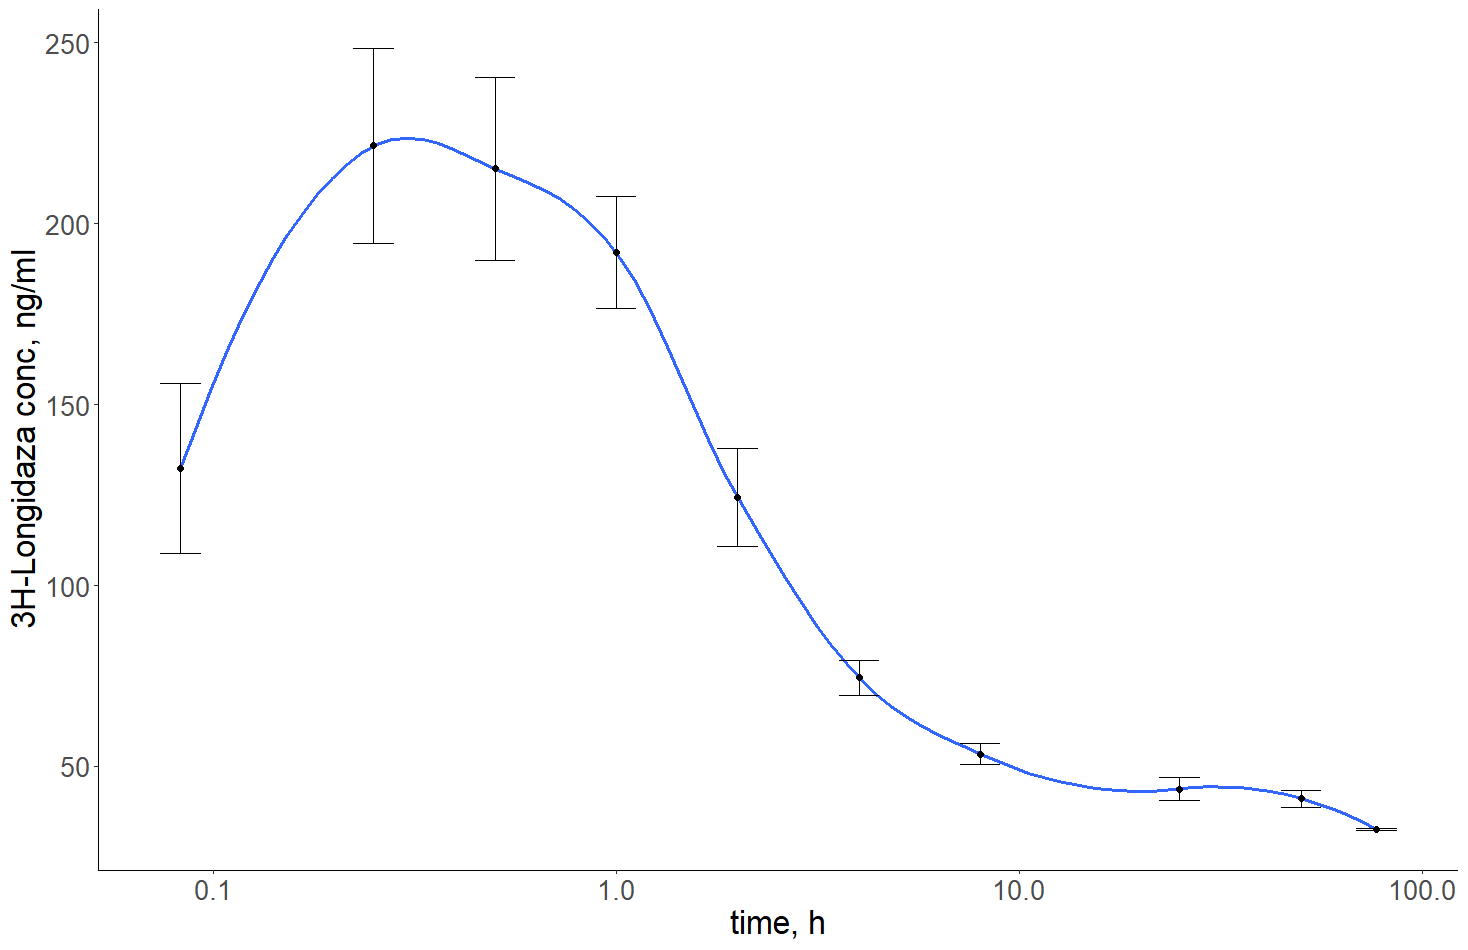


**Figure S1**. Graph of the Longidaza concentration (ng/ml) versus time after intramuscular injection.
